# Supplementary material
Source: publisher site journal article supplement (https://www.dovepress.com/article/589306)
Supplement: Supplementary file 1 [file 589306%20Revised%20%2509Supplementary_file.docx]

**Supplementary Table 1:** Linear and logistic regression analyses for the relationship between second-trimester Hb and birth weight, low birth weight, and small-for-gestational-age, additionally adjusting for first-trimester Hb level

| **Birth weight**  **β (95% CI)** | | |
| --- | --- | --- |
| Hb (continuous) | -5.1 (-7.8, -2.5) | **<0.001** |
| Tertile 1 | Reference |  |
| Tertile 2 | -71 (-124, -19) | **0.008** |
| Tertile 3 | -103 (-165, -40) | **0.001** |
| **Low birth weight**  **OR (95% CI)** | | |
| Hb (continuous) | 1.05 (1.02, 1.08) | **0.001** |
| Tertile 1 | Reference |  |
| Tertile 2 | 1.57 (0.85, 2.96) | 0.150 |
| Tertile 3 | 2.77 (1.40, 5.57) | **0.004** |
| **Small-for-gestational-age**  **OR (95% CI)** | | |
| Hb (continuous) | 1.04 (1.01, 1.06) | **0.001** |
| Tertile 1 | Reference |  |
| Tertile 2 | 1.29 (0.80, 2.08) | 0.300 |
| Tertile 3 | 1.96 (1.14, 3.38) | **0.015** |

*Adjusted for maternal age, early-pregnancy BMI, parity, pre-existing diabetes mellitus, pre-existing hypertension, and* ***first-trimester Hb level****. Hb: maternal hemoglobin; Bolded p-values indicate statistical significance at 5% level.*
